# Supplementary material
Source: PubMed Central journal article supplement (PMC8722738)
Supplement: aim-olf-M212019-M21-2019_Supplement.pdf [file aim-olf-M212019-M21-2019_Supplement.pdf]

## Supplementary Material\*

Delgado MK, Morgan AU, Asch DA, et al. Comparative effectiveness of an automated text messaging service for monitoring COVID-19 at home. *Ann Intern Med.* 16 November 2021. [Epub ahead of print]. doi:10.7326/M21-2019

*Supplement Figure 1.* COVID Watch Text Messaging and Clinical Escalation Algorithm

*Supplement Figure 2.* COVID Watch Patient Instructions

Additional Methodological Details

1. Selection of outcomes and follow up period
2. Calculation of Days Alive and Out of Hospital (DAOH)
3. Propensity score modeling and outcomes estimation

*Supplement Figure 3.* Overlap of Propensity Scores for Enrollment in COVID Watch

*Supplement Figure 4.* Change in Standard Mean Differences Before and After Propensity Score Weighting

*Supplement Table 1.* COVID Watch Program Metrics

*Supplement Table 2.* Sensitivity Analysis for Unobserved Confounding

*Supplement Table 3.* Sensitivity Analysis for Deaths Among those Excluded from Primary Analysis

*Supplement Table 4.* “Per Protocol” Sensitivity Analyses of Outcomes by COVID Watch Engagement

*Supplement Table 5.* Baseline Characteristics of Patients Who Died

*Supplement Table 6.* Coded Diagnoses of In-Hospital Deaths

\* This supplementary material was provided by the authors to give readers further details on their article. The material was reviewed but not copyedited.

# Supplement Figure 1. COVID Watch Text Messaging and Clinical Escalation Algorithm

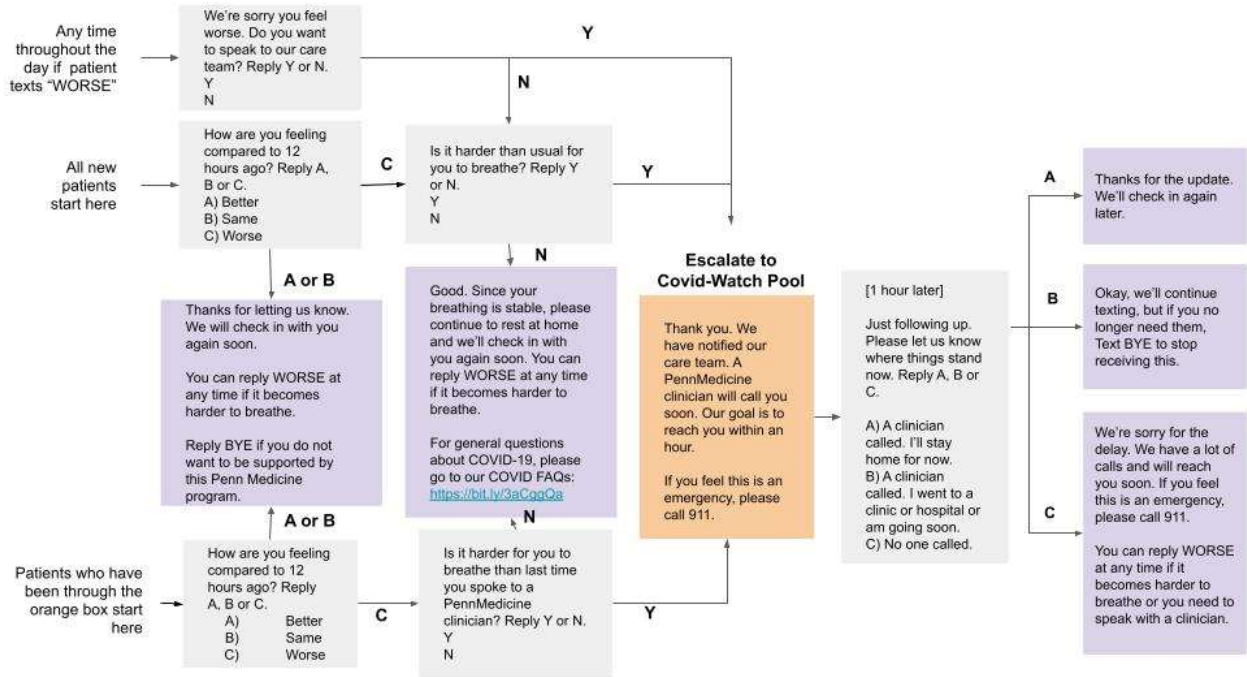

Revised 4.14.20

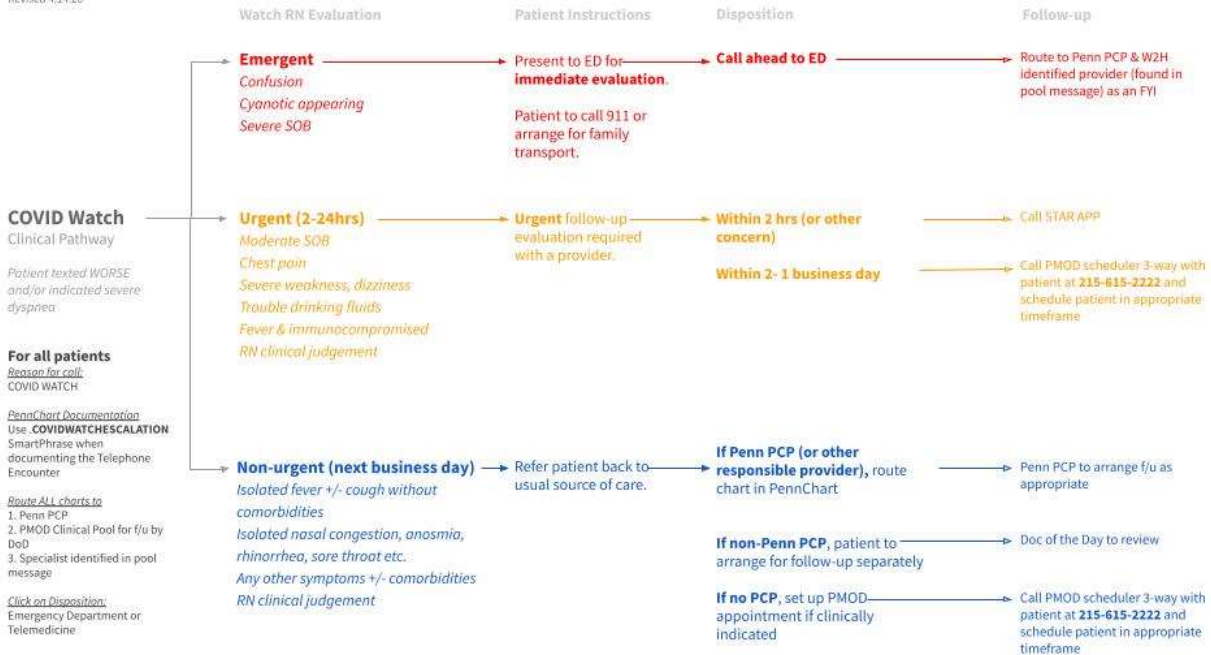

## Supplement Figure 2. COVID Watch Patient Instructions

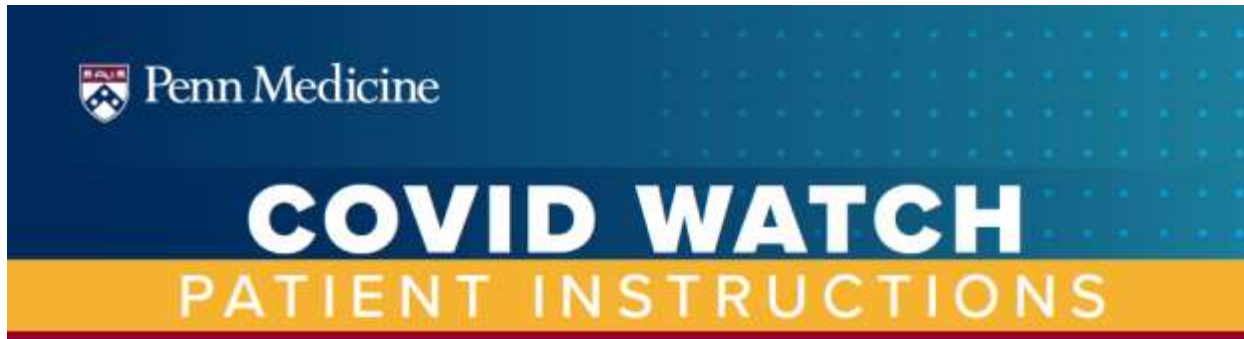

COVID Watch is a 14-day text-based program that can help you get the right care you need at the right time. Your text updates allow a dedicated team of nurses and doctors to monitor your progress. Working together we can get you the care you need. We are available 24/7.

### GETTING STARTED

You will first receive a welcome text. Please reply "Y" to begin the COVID Watch program.

Texts from COVID Watch will come from **29508**.

You will receive 2 check-in texts each day for the next 14 days.

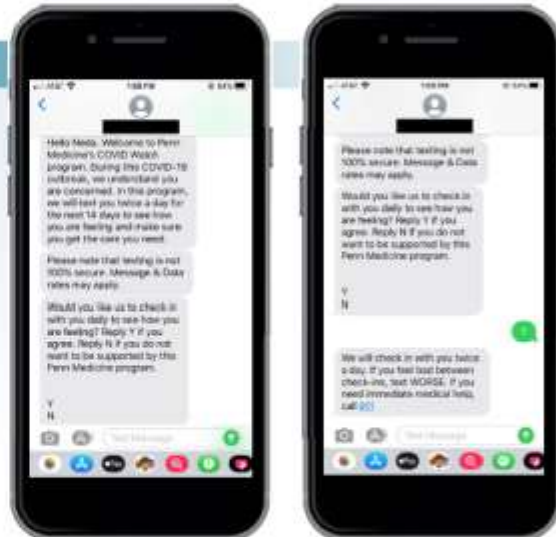

### DAILY CHECK-INS

Every morning and afternoon, COVID Watch will send you a check-in message to see how you are feeling.

Respond: "A" if you are feeling better, "B" if you feel the same, "C" if you are feeling worse.

Reply **ONLY** with single letters as shown.

If you feel worse at any point, text "WORSE" and a Penn Medicine clinician will call you within 1 hour.

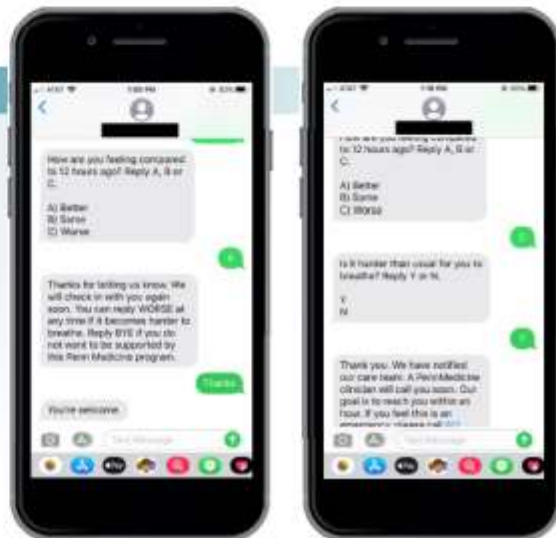

## **Additional Methodological Details**

### ***1. Selection of Outcomes and Follow up Period***

Our IRB protocol submitted in July 2020 (available on the Annals of Internal Medicine website) pre-specifies the main outcomes reported in Table 3 and Table 4. After our Patient Centered Outcomes Research Institute (PCORI) grant was funded (August 18, 2020) we met with our patient and stakeholder advisory panel August 25, 2020 (members noted in Acknowledgements section). Stakeholders identified survival as the outcome most important to them and thus we selected 30-day mortality as our primary outcome. Stakeholder engagement in driving the research question is important to our team of investigators and is required of this grant.

Given the chance to revise and resubmit our work allowing additional time for ascertaining follow-up outcomes, at the request of the Editors and peer-reviewers, we added 60-day outcomes as a secondary analysis. Outcomes presented in this manuscript were pulled in July 2021, allowing seven months for out-of-hospital death notifications to make it into the electronic health record. National Death Index data were not yet available at the time of manuscript resubmission.

### ***2. Calculation of Days Alive and Out of Hospital (DAOH)***

Traditional calculation of DAOH factors inpatient hospital days and mortality over a given period of follow-up (see <https://www.ncbi.nlm.nih.gov/pmc/articles/PMC6347414/#R9> and <https://jamanetwork.com/journals/jama/fullarticle/2775280>). However, given the nature of our intervention to send patients to the ED when needed and avoid ED visits if not needed,

we sought to capture trips to the ED as an event in which the patient is not “out of hospital.”

DAOH Algorithm:

- Start of the 30-day period (Day 0):
  - For patients tested in outpatient setting: date of COVID test collection.
  - For patients tested in the hospital (ED and inpatient discharges): the date of discharge.
- Day 1: the calendar date after the index event. Events counted between Day 1 to Day 30:
  - ED days
  - Inpatient days
  - Days after death
- Any subsequent ED or hospital contact counts for the entire day of that contact.
  - Do not double-count a day because it has an ED event and a hospital event.

### ***3. Propensity Score Modeling and Outcomes Estimation***

It is common in practice to specify a fully parametric model (such as logistic regression) to obtain predictions such as the propensity score. However, with a large number of covariates, machine learning approaches such as random forests and neural nets are often preferred because of their flexibility to better discover complex relationships including interactions, higher-order terms, and non-linear functions. The challenge, in practice, is to decide which machine learning approach to use. We therefore began our propensity score modeling using ensemble machine learning approach called SuperLearner which weights both parametric and nonparametric models to obtain optimal predictions using cross-validation.<sup>1,2</sup>

The advantage to ensemble machine learning approaches, such as SuperLearner, is that the analyst does not have to choose one over the others. SuperLearner combines multiple algorithms (learners) into a single algorithm and provides a prediction function. SuperLearner utilizes cross-validation to obtain an optimal prediction by minimizing the loss function (such as

the best cross-validated mean squared error). SuperLearner allows a wide range of parametric, semiparametric, and nonparametric algorithms/models/learners/wrappers including generalized linear models, BART, random forests, boosting, bagging, neural nets, ridge regression, LASSO, and support vector machines just to name a few. In our analysis, we specified logistic regression, BART, random forests, support vector machines, and caret models simultaneously in the model fitting process.

We found that logistic regression performed the best and received almost full weight compared to the other algorithms. Hence, we presented our results based on propensity score weights estimated from logistic regression (which are nearly identical to our results using SuperLearner). Propensity score distributions were evaluated for non-overlap to ensure that there were no serious positivity violations. Propensity scores and weights obtained with SuperLearner are presented in Supplement Figures 3 and 4.

In our final models, we only used inverse probability weights and did not further covariate adjust. Our reasoning for this approach was threefold. First, we used propensity score weighting to achieve balance between the treatment arms (which we achieved). Second, we did not further adjust for covariates because of the challenge of having a small number of outcomes (which we anticipated). We felt that any adjustment of covariates would lead to dangerous extrapolations of the model to covariate spaces that were not supported by the data. Third, we targeted a marginal estimand because of its relevance to policy making rather than a conditional treatment effect which would have resulted from adjusting for further covariates. As a sensitivity analysis, we did further adjust for key covariates that could impact

the outcome but found nearly identical results. For example, for difference in death rate at 30 days:

- Primary analysis with propensity score weighting: -0.19% (95% CI: -0.32, - 0.06%), p =0.005
- Primary analysis with propensity score weighting plus regression adjustment for age categories, sex, place of residence, month, income: -0.18% (95% CI: -0.31, - 0.05%), p =0.005

And for difference in death rate at 60 days:

- Primary analysis with propensity score weighting: -0.25% (95% CI: -0.41, - 0.10%), p =0.002
- Primary analysis with propensity score weighting plus regression adjustment for age categories, sex, place of residence, month, income: -0.25% (95% CI: -0.40, - 0.06%), p =0.002

### **References**

1. Van der Laan M, Polley E, Hubbard A. Super learner. Statistical applications in genetics and molecular biology. *Super learner Statistical applications in genetics and molecular biology*. 2007;6(1).
2. Van der Laan MJ, Rose S. *Targeted learning: causal inference for observational and experimental data*. Springer Science & Business Media; 2011.

**Supplement Figure 3. Overlap of Propensity Scores for Enrollment in COVID Watch by Treatment Group**

A) Overlap of propensity scores obtained with logistic regression (primary analysis)

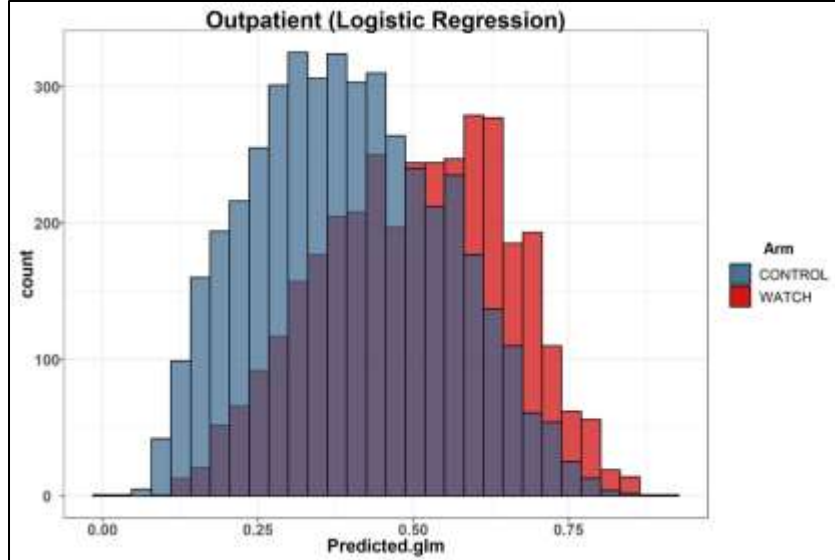

B) Overlap of propensity scores obtained with ensemble machine learning approach (SuperLearner) for comparison

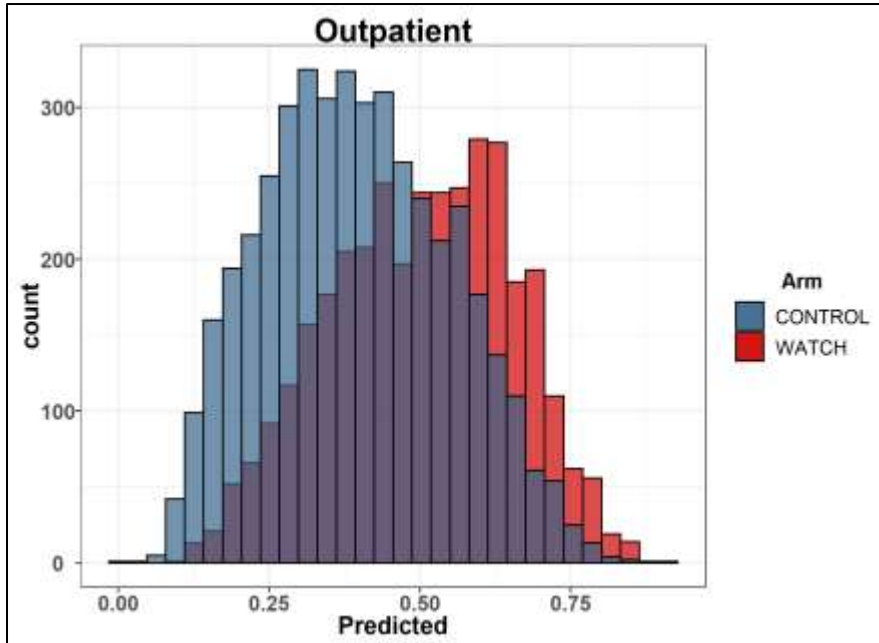



**Supplement Figure 4. Change in Standard Mean Differences Before and After Propensity Score Weighting**

A) Primary analysis using logistic regression

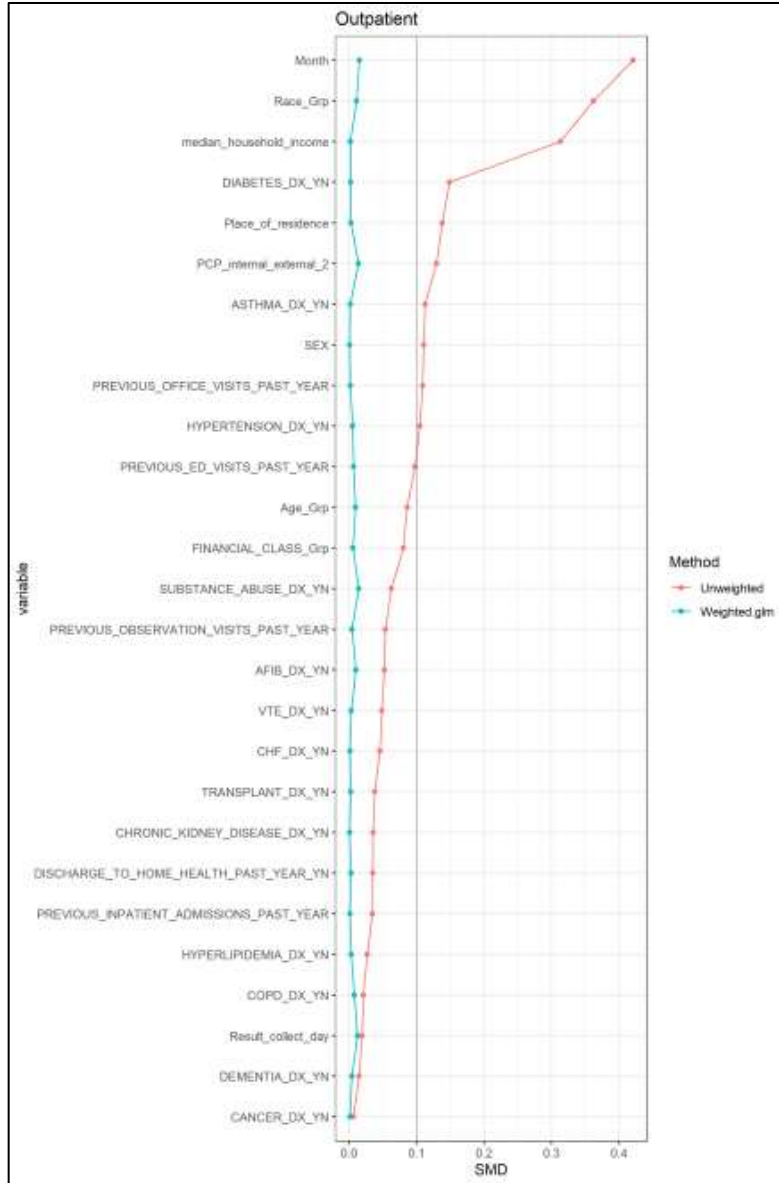

SMD: Standardized mean differences

B) Ensemble machine learning approach (SuperLearner) for comparison

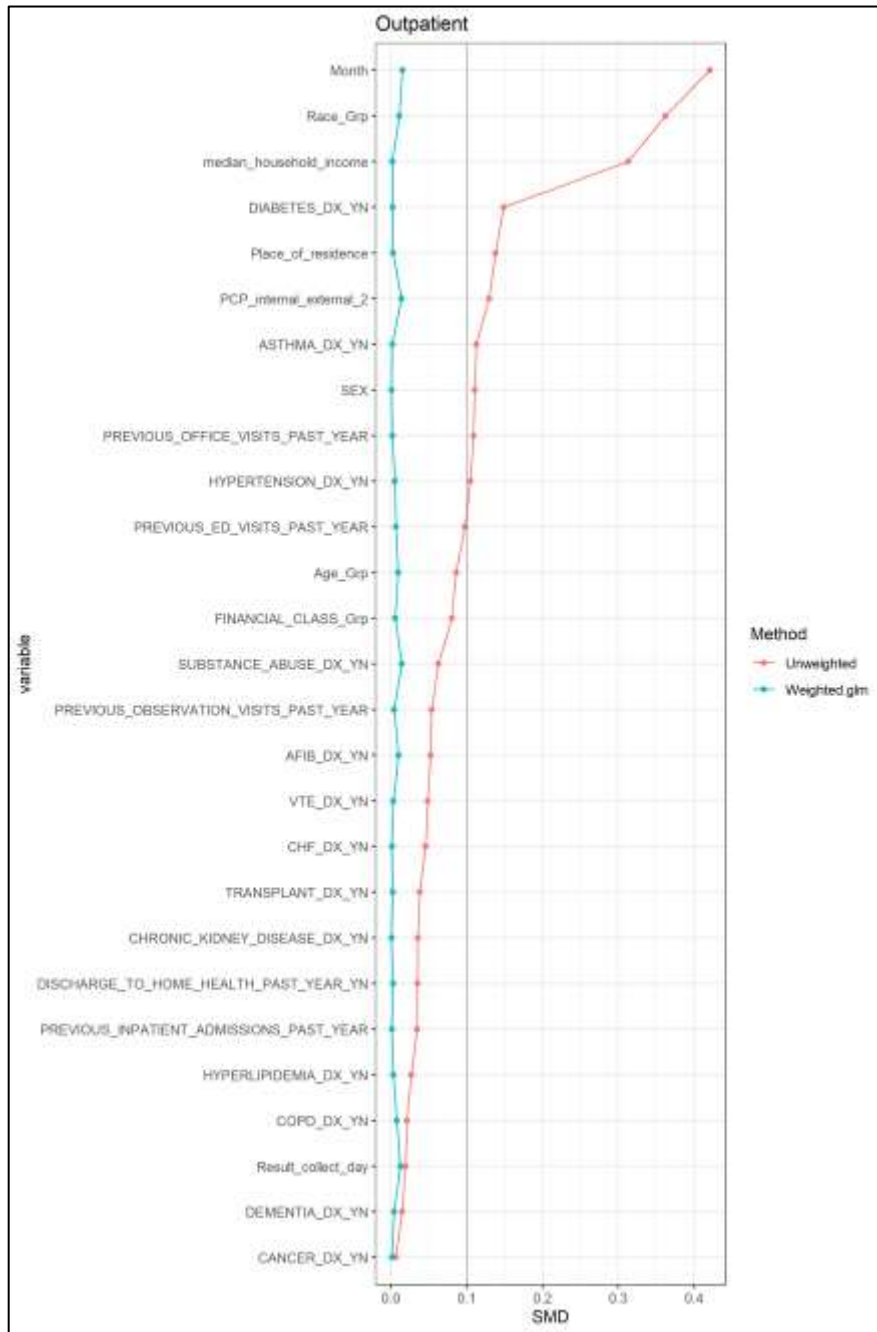

SMD: Standardized mean differences

**Supplement Table 1. COVID Watch Program Metrics**

| <b>General Enrollment Process Metrics</b>        | <b>Overall</b> |
|--------------------------------------------------|----------------|
| Total Enrolled                                   | 3488           |
| Non-responsive, n (%)                            | 460 (13.2)     |
| Responsive and engaged with program, n (%)       | 3028 (86.8)    |
| Extended from 14 to 21 days of monitoring, n (%) | 588 (19.4)     |
| Total text responses, mean (SD)                  | 23.18 (12.40)  |
| Texts responses per day, mean (SD)               | 2.08 (0.90)    |
| Days enrolled in COVID Watch, mean (SD)          | 11.79 (7.08)   |
| <b>Escalation Metrics</b>                        |                |
| Escalated to an RN, n (%)                        | 434 (14.3)     |
| Escalations to an RN/per patient, mean (SD)      | 0.20 (0.58)    |
| <b>Escalations (n)</b>                           |                |
| Escalations (n)                                  | 595            |
| Response time in minutes, mean (SD)              | 24.26 (40.48)  |
| <b>Clinical recommendations and response</b>     |                |
| Continue to self-monitor                         | 228 (38.3)     |
| Telemedicine appointment within 24 hours         | 69 (11.6)      |
| Contact PCP within next 24-48 hours              | 11 (1.8)       |
| Urgent telemedicine appointment within 6 hours   | 157 (26.3)     |
| Direct ED referral                               | 90 (15.1)      |
| No response to contact attempts                  | 41 (6.9)       |

**Supplement Table 2. Sensitivity Analysis for Unobserved Confounding**

To assess the sensitivity of our 60-day mortality results to potential unmeasured confounding, we conducted a sensitivity analysis based on the Rosenbaum gamma approach using the R package ‘rbounds’ (2.1). Our table below demonstrates that there would need to be a substantial amount of unaccounted for confounding to reverse our statistically significant findings. Specifically, there would need to be an 1.8 times greater odds of differential assignment to Watch versus the control arm that was attributable to unobserved factors (upper bound >0.05). Given the large number of important covariates we have accounted for in our analysis, it is unlikely that such an impactful covariate was not included; hence, we feel that our results are robust to potential unmeasured confounding.

| Gamma                                                                             | Lower bound | Upper bound |
|-----------------------------------------------------------------------------------|-------------|-------------|
| 1.0                                                                               | 0           | 0.0000      |
| 1.1                                                                               | 0           | 0.0000      |
| 1.2                                                                               | 0           | 0.0000      |
| 1.3                                                                               | 0           | 0.0001      |
| 1.4                                                                               | 0           | 0.0008      |
| 1.5                                                                               | 0           | 0.0032      |
| 1.6                                                                               | 0           | 0.0099      |
| 1.7                                                                               | 0           | 0.0253      |
| 1.8                                                                               | 0           | 0.0545      |
| 1.9                                                                               | 0           | 0.1019      |
| 2.0                                                                               | 0           | 0.1694      |
| Gamma is odds of differential assignment to COVID WATCH due to unobserved factors |             |             |

**Supplement Table 3. Sensitivity Analysis for Deaths Within 30 Days Among those Excluded from Primary Analysis**

We also assessed the effect of re-including patients with DNR/DNI directives in place prior to COVID-19 testing, and patients with any prior evidence of acute rehab, long term care facility, or skilled nursing facility services even if these patients had no documentation of actively using these services at the time of Covid-19 testing given these were not exclusion criteria for COVID Watch enrollment. Re-including patients in the sample who were DNR/DNI (COVID Watch n=3, usual care =19) or who had any prior evidence of long term care in the past year (COVID Watch n=24, usual care n=64) only strengthened that primary finding that COVID Watch enrolled patients had significantly lower mortality rates compared with usual care (table below).

|                                                                                                                                   |                                                                 | Usual Care                         | Covid Watch |         |
|-----------------------------------------------------------------------------------------------------------------------------------|-----------------------------------------------------------------|------------------------------------|-------------|---------|
| N                                                                                                                                 |                                                                 | 4450                               | 3516        |         |
| All patients, but re-including DNR/DNI & patients who had previously been in long term care but were now living at home (N=7,987) | All deaths, unadjusted, No. (%)                                 | 23 (0.52)                          | 6 (0.17)    | 0.018   |
|                                                                                                                                   | In-hospital deaths, No. (%)                                     | 15 (65.2)                          | 5 (83.3)    | 0.633   |
|                                                                                                                                   | Out-of-hospital deaths, No. (%)                                 | 8 (34.8)                           | 1 (16.7)    |         |
|                                                                                                                                   | All deaths, adjusted difference relative to usual care (95% CI) | -3.8 deaths per 1,000 (-5.6, -2.0) |             | < 0.001 |
| Patients with missing data (N=21)                                                                                                 | All deaths, No. (%)                                             | 0                                  | 0           |         |

DNR: Do Not Resuscitate; DNI: Do Not Intubate

**Supplement Table 4. “Per Protocol” Sensitivity Analyses of Outcomes by COVID Watch Engagement**

| <b>Unweighted Outcomes of Engaged COVID Watch patients vs. Usual Care</b> |                |                   |                    |          |
|---------------------------------------------------------------------------|----------------|-------------------|--------------------|----------|
|                                                                           | <b>Overall</b> | <b>Usual Care</b> | <b>Covid Watch</b> | <b>p</b> |
| n                                                                         | 7405           | 4377              | 3028               |          |
| Deaths at 30 days                                                         | 14 (0.19)      | 12 (0.27)         | 2 (0.07)           | 0.055    |
| Days Alive and Out of Hospital at 30 days, mean (SD)                      | 29.65 (2.00)   | 29.71 (1.98)      | 29.56 (2.03)       | 0.001    |
| Deaths at 60 days                                                         | 19 (0.26)      | 16 (0.37)         | 3 (0.10)           | 0.033    |
| Days Alive and Out of Hospital at 60 days, mean (SD)                      | 59.50 (3.39)   | 59.54 (3.66)      | 59.45 (2.96)       | 0.288    |

| <b>Weighted Outcomes of Engaged COVID Watch patients vs. Usual Care</b> |                                                               |          |                            |          |
|-------------------------------------------------------------------------|---------------------------------------------------------------|----------|----------------------------|----------|
|                                                                         | <b>Difference between COVID Watch and usual care (95% CI)</b> | <b>p</b> | <b>Odds Ratio (95% CI)</b> | <b>p</b> |
| Deaths at 30 days                                                       | -2.0 per 1,000 (3.3, -0.7)                                    | 0.002    | 0.25 (0.08, 0.62)          | 0.006    |
| Days Alive and Out of Hospital at 30 days, mean (SD)                    | -0.16 (-0.25, -0.07)                                          | <0.001   |                            |          |
| Deaths at 60 days                                                       | -2.8 per 1,000 (-4.3, -1.3)                                   | <0.001   | 0.25 (0.10, 0.55)          | 0.001    |
| Days Alive and Out of Hospital at 60 days, mean (SD)                    | -0.09 (-0.25, 0.06)                                           | 0.249    |                            |          |

| <b>Unadjusted Outcomes of COVID Watch Patients by Engagement</b> |                   |                       |          |
|------------------------------------------------------------------|-------------------|-----------------------|----------|
|                                                                  | <b>Responsive</b> | <b>Non-responsive</b> | <b>p</b> |
| n                                                                | 3028              | 460                   |          |
| Deaths at 30 days                                                | 2 (0.07)          | 1 (0.22)              | 0.346    |
| Days Alive and Out of Hospital at 30 days, mean (SD)             | 29.6 (2.03)       | 29.2 (3.33)           | 0.002    |
| ED visits within 30 days                                         | 368 (12.15)       | 52 (11.30)            | 0.657    |
| Deaths at 60 days                                                | 3 (0.10)          | 2 (0.43)              | 0.132    |
| Days Alive and Out of Hospital at 60 days, mean (SD)             | 59.5 (2.96)       | 58.9 (5.35)           | 0.001    |

**Supplement Table 5. Baseline Characteristics of Patients Who Died Within 60 Days**

|                                                      | Overall       | Usual Care    | Covid Watch   | p     |
|------------------------------------------------------|---------------|---------------|---------------|-------|
| n                                                    | 21            | 16            | 5             |       |
| Age, mean years (standard deviation, SD)             | 67.90 (15.07) | 68.19 (15.81) | 67.00 (14.04) | 0.882 |
| Age group, years                                     |               |               |               |       |
| <40                                                  | 1 (4.8)       | 1 (6.2)       | 0 (0.0)       | 1     |
| 40-49                                                | 0 (0)         | 0 (0)         | 0 (0)         | NA    |
| 50-59                                                | 3 (14.3)      | 2 (12.5)      | 1 (20.0)      | 1     |
| 60-69                                                | 8 (38.1)      | 5 (31.2)      | 3 (60.0)      | 0.53  |
| 70 or older                                          | 9 (42.9)      | 8 (50.0)      | 1 (20.0)      | 0.506 |
| Male, No. (%)                                        | 14 (66.7)     | 12 (75.0)     | 2 (40.0)      | 0.365 |
| Race and ethnicity, No. (%)                          |               |               |               | 0.296 |
| Hispanic                                             | 4 (19.0)      | 3 (18.8)      | 1 (20.0)      |       |
| Non-Hispanic Black                                   | 6 (28.6)      | 3 (18.8)      | 3 (60.0)      |       |
| Non-Hispanic White                                   | 9 (42.9)      | 8 (50.0)      | 1 (20.0)      |       |
| Other/Unknown                                        | 2 (9.5)       | 2 (12.5)      | 0 (0.0)       |       |
| Insurance Coverage, No. (%)                          |               |               |               | 0.779 |
| Blue Cross, Blue Shield, Commercial, or Managed Care | 9 (42.9)      | 7 (43.8)      | 2 (40.0)      |       |
| Medicaid or Managed Medicaid                         | 2 (9.5)       | 1 (6.2)       | 1 (20.0)      |       |
| Medicare or Managed Medicare                         | 9 (42.9)      | 7 (43.8)      | 2 (40.0)      |       |
| Other                                                | 1 (4.8)       | 1 (6.2)       | 0 (0.0)       |       |
| Source of Primary Care, No. (%)                      |               |               |               | 0.457 |
| Non-Penn Medicine primary care                       | 6 (28.6)      | 4 (25.0)      | 2 (40.0)      |       |
| Penn Medicine primary care                           | 13 (61.9)     | 11 (68.8)     | 2 (40.0)      |       |
| No PCP                                               | 2 (9.5)       | 1 (6.2)       | 1 (20.0)      |       |
| Body mass index, mean (SD)                           | 32.3 (7.55)   | 32.8 (7.56)   | 29.7 (8.52)   | 0.538 |
| Pre-existing conditions, No. (%)                     |               |               |               |       |
| Hypertension                                         | 13 (61.9)     | 10 (62.5)     | 3 (60.0)      | 1     |
| Diabetes                                             | 7 (33.3)      | 6 (37.5)      | 1 (20.0)      | 0.856 |
| Hyperlipidemia                                       | 9 (42.9)      | 7 (43.8)      | 2 (40.0)      | 1     |
| Chronic heart failure                                | 2 (9.5)       | 2 (12.5)      | 0 (0.0)       | 1     |
| Atrial fibrillation                                  | 5 (23.8)      | 5 (31.2)      | 0 (0.0)       | 0.406 |
| Chronic obstructive pulmonary disease                | 8 (38.1)      | 7 (43.8)      | 1 (20.0)      | 0.669 |
| Asthma                                               | 1 (4.8)       | 1 (6.2)       | 0 (0.0)       | 1     |
| Chronic kidney disease                               | 0 (0)         | 0 (0)         | 0 (0)         | NA    |
| Cancer                                               | 2 (9.5)       | 1 (6.2)       | 1 (20.0)      | 0.967 |
| Venous thromboembolism                               | 1 (4.8)       | 0 (0.0)       | 1 (20.0)      | 0.529 |

|                                                                     |                   |                   |                   |       |
|---------------------------------------------------------------------|-------------------|-------------------|-------------------|-------|
| Received a transplant                                               | 7 (33.3)          | 6 (37.5)          | 1 (20.0)          | 0.856 |
| Dementia                                                            | 1 (4.8)           | 1 (6.2)           | 0 (0.0)           | 1     |
| Substance use diagnosis                                             | 1 (4.8)           | 1 (6.2)           | 0 (0.0)           | 1     |
| State of residence (%)                                              |                   |                   |                   | 0.359 |
| New Jersey                                                          | 4 (9.0)           | 4 (25.0)          | 0 (0.0)           |       |
| Other                                                               | 1 (4.8)           | 1 (6.2)           | 0 (0.0)           |       |
| Pennsylvania                                                        | 16 (76.2)         | 11 (68.8)         | 5 (100.0)         |       |
| Median household income of home ZIP code, mean U.S. dollars \$ (SD) | 71575.9 (35463.1) | 76918.9 (35186.2) | 54478.2 (34143.7) | 0.226 |
| Hospital and office visits 1 year prior to COVID testing, mean (SD) |                   |                   |                   |       |
| ED visit                                                            | 0.10 (0.44)       | 0.12 (0.50)       | 0.00 (0.00)       | 0.589 |
| Admission - observation                                             | 0.05 (0.22)       | 0.06 (0.25)       | 0.00 (0.00)       | 0.589 |
| Admission - inpatient                                               | 0.57 (1.54)       | 0.31 (0.48)       | 1.40 (3.13)       | 0.173 |
| Office visit                                                        | 5.14 (5.99)       | 5.31 (5.45)       | 4.60 (8.23)       | 0.823 |
| Prior discharge to home health, no longer on home health, No. (%)   | 3 (14.3)          | 2 (12.5)          | 1 (20.0)          | 1     |
| Days between COVID test and result, mean (SD)                       | 1.14 (1.46)       | 1.19 (1.64)       | 1.00 (0.71)       | 0.809 |
| Month of index positive test (%)                                    |                   |                   |                   | 0.076 |
| March                                                               | 0 (0)             | 0 (0)             | 0 (0)             |       |
| April                                                               | 5 (23.8)          | 2 (12.5)          | 3 (60.0)          |       |
| May                                                                 | 5 (23.8)          | 4 (25.0)          | 1 (20.0)          |       |
| June                                                                | 0 (0)             | 0 (0)             | 0 (0)             |       |
| July                                                                | 0 (0)             | 0 (0)             | 0 (0)             |       |
| August                                                              | 1 (4.8)           | 1 (6.2)           | 0 (0.0)           |       |
| September                                                           | 1 (4.8)           | 1 (6.2)           | 0 (0.0)           |       |
| October                                                             | 1 (4.8)           | 0 (0.0)           | 1 (20.0)          |       |
| November                                                            | 8 (38.1)          | 8 (50.0)          | 0 (0.0)           |       |



**Supplement Table 6. Coded Diagnoses of In-Hospital Deaths**

| <b>Within Health System Hospital Deaths, (n=6), primary diagnoses</b> | n |
|-----------------------------------------------------------------------|---|
| Acute kidney failure with tubular necrosis                            | 1 |
| COVID-19                                                              | 2 |
| Other specified sepsis                                                | 3 |
|                                                                       |   |
| <b>Outside Hospital Deaths (n=9), top 10 most common diagnoses*</b>   | n |
| Other viral pneumonia                                                 | 6 |
| COVID-19                                                              | 5 |
| Hypoxemia                                                             | 4 |
| Acidosis                                                              | 2 |
| Acute kidney failure, unspecified                                     | 2 |
| Acute respiratory failure with hypoxia                                | 2 |
| Cough                                                                 | 2 |
| Essential (primary) hypertension                                      | 2 |
| Shortness of Breath                                                   | 2 |
| Weakness                                                              | 2 |

\*Health information exchange data provide all diagnosis codes associated with encounter, but in no particular order
